# Supplementary material
Source: PubMed Central journal article supplement (PMC8092528)

### **Genes investigated by PCR**

*bla*<sub>KPC</sub>, *bla*<sub>NDM</sub>, *bla*<sub>OXA-48</sub>, *bla*<sub>IMP</sub>, *bla*<sub>VIM</sub>, *bla*<sub>BKC</sub>, *bla*<sub>CTX-group</sub>, *bla*<sub>TEM</sub>, *bla*<sub>SHV</sub>, *aac*(3)-Ia, *aac*(3)-IIa, *aac*(6')-Ih, *aph*(3')-VI, *ant*(2')-Ia, *aph*(3')-Ia, *aac*(6')-Ib.

Nicoletti AG, Marcondes MF, Martins WM, Almeida LGP, Nicolás MF, Vasconcelos ATR, et al. Characterization of BKC-1 class A carbapenemase from *Klebsiella pneumoniae* clinical isolates in Brazil. *Antimicrob Agents Chemother* 2015;59(9):5159-5164.

Dallenne C, Da Costa A, Decré D, Favier C, Arlet G. Development of a set of multiplex PCR assays for the detection of genes encoding important beta-lactamases in Enterobacteriaceae. *J Antimicrob Chemother* 2010;65(3):490-495.

Akers KS, Chaney C, Barsoumian A, Beckius M, Zera W, Yu X, et al. Aminoglycoside resistance and susceptibility testing errors in *Acinetobacter baumannii*-*calcoaceticus* complex. *J Clin Microbiol* 2010;48(4):1132-1138.

### **ANI analysis**

The following strains were used in the ANI analysis: *E. asburiae* (CP011863.1), *E. cloacae* subsp. *cloacae* ATCC13407 (NC\_014121.1), *E. hormaechei* subsp. *steigerwaltii* (NZ\_CP017179.1), *E. hormaechei* subsp. *oharae* (NZ\_CP017180), *E. hormaechei* subsp. *xiangfangensis* (NZ\_CP017183.1), *E. hormaechei* subsp. *hoffmannii* (CP017186.1), *E. hormaechei* subsp. *hormaechei* (MKEQ01000001-MKEQ01000004), *E. bungandensis* (LT992502.1), *E. ludwigii* (CP017279.1), *E. kobei* (NZ\_CP017181.1), and *E. cancerogenus* (NZ\_CP045769.1).

**Fig S1.** Plasmid-mediated ARG detected in Ec61. The plasmid location of each gene is demonstrated between the parentheses.

|                                       | Ec61 plasmids                  |                                                                                                                                                                                                             |                                                   |
|---------------------------------------|--------------------------------|-------------------------------------------------------------------------------------------------------------------------------------------------------------------------------------------------------------|---------------------------------------------------|
|                                       | pEc61A                         | pEc61B                                                                                                                                                                                                      | pEc61C                                            |
| <b>General Features</b>               | 149,802 bp<br>52% GC<br>IncFIB | 77,651 bp<br>53.5%<br>IncC                                                                                                                                                                                  | 8382 bp<br>59.4%<br>IncQ1                         |
| <b>Antimicrobial Resistance Genes</b> | mcr-9 (28747.. 30366)          | aac(6)-Ib3 (39040..39594)<br>aadA1 (38179..38970)<br>blaSHV-5 (30232..31092)<br>aac(6)-Ib-cr (39040..39558)<br>sul1 (36835..37674)<br>sul2 (49991..50806)<br>tet(C) (42887..44077)<br>tet(D) (21060..22244) | aph(3')-Via (2562..3341)<br>blaBKC-2 (3498..4439) |

**Fig S2.** Clustal W alignment of protein sequences. Amino acid substitutions are highlighted on purple boxes.

```
CLUSTAL W (1.83) multiple sequence alignment
blaACT-84 MMKSLCCALLLGLSCSALAAPVSEKQLAEVVANTVPLMKAQSVPGMAVAVIYQGKPHYYTFGKADIAANKPVTPQTLF
blaACT-83 MMKSLCCALLLGLSCSALAAPVSEKQLAEVVANTVPLMKAQSVPGMAVAVIYQGKSHYYTFGKADIAANKPVTPQTLF
*****
blaACT-84 ELGSISKTFVTGVLGGDAIARGEISLDDPVTRYWPELTGKQWQGIRMLDLATYTAGGLPLQVPDEVTDASLLRFYQHWQP
blaACT-83 ELGSISKTFVTGVLGGDAIARGEISLDDPVTRYWPELTGKQWQGIRMLDLATYTAGGLPLQVPDEVTDASLLRFYQHWQP
*****
blaACT-84 QWKPGTTRLYANASIGLFGALAVKPSGMRYEQAMTERVFKPLALHHTWINVPKAEAAHYAWGYRDGKAVRVSPGMLDAQA
blaACT-83 QWKPGTTRLYANASIGLFGALAVKPSGMRYEQAMTERVFKPLALHHTWINVPKAEAAHYAWGYRDGKAVRVSPGMLDAQA
*****
blaACT-84 YGVKTNVQDMANWVMANMAPEKVADASLKQGIALAQSRYWRIGSMYQGLGWEMLNWPVEANTVVEGSDSKVALAPLPVAE
blaACT-83 YGVKTNVQDMANWVMANMAPEKVADASLKQGIALAQSRYWRIGSMYQGLGWEMLNWPVEANTVVEGSDSKVALAPLPVAE
*****
blaACT-84 VNPPAPPVKASWVHKTGSTGGFGSYVAFIPEKQIGIVMLANKSYPNPARVEAAYHILEALQ
blaACT-83 VNPPAPPVKASWVHKTGSTGGFGSYVAFIPEKQIGIVMLANKSYPNPARVEAAYHILEALQ
*****
```

```
CLUSTAL W (1.83) multiple sequence alignment
BKC-1 MTITFSRRQAIAGALLAVPAVSTLAASAGALLAVPAVSTLAASAGAATGGLEKRLAELEGRHKGRIGVAIHNLATGARI
BKC-2 MTITFSRRQAIAGALLAVPAVSTLAASAGAATGGLEKRLAELEGRHKGRIGVAIHNLATGARI
*****
BKC-1 GHRADERFLMCSTFKALLAAHILARVDRKEETLDRRIVVGKSDLVDWSPVVETRVGGEGISIAELCEAAITLSDNAAAANL
BKC-2 GHRADERFLMCSTFKALLAAHILARVDRKEETLDRRIVVGKSDLVDWSPVVETRVGGEGISIAELCEAAITLSDNAAAANL
*****
BKC-1 LLSASGGPKAVTQFLRGFGDDVTRLDRTEPTLNYRETPODDERDTTTPAAMAETLRKLIIGDVLARGSKAQLAAWLVMNKT
BKC-2 LLSASGGPKAVTQFLRGFGDDVTRLDRTEPTLNYRETPODDERDTTTPAAMAETLRKLIIGDVLARGSKAQLAAWLVMNKT
*****
BKC-1 GDTRLRAGFPVDWTTGDKTGTNGDRHGNANDVAIAWSPDRGAVVVTAFCEIPGISGDERNAVIAEIGRIAEEA
BKC-2 GDTRLRAGFPVDWTTGDKTGTNGDRHGNANDVAIAWSPDRGAVVVTAFCEIPGISGDERNAVIAEIGRIAEEA
*****
```

**Fig S3.** Representation of the 250 bp nucleotide distribution of the remaining *ISKpn23* sequence detected in the pEc61C. The predicted promoter was detected in a region denominated IRL (left inverted repeat).

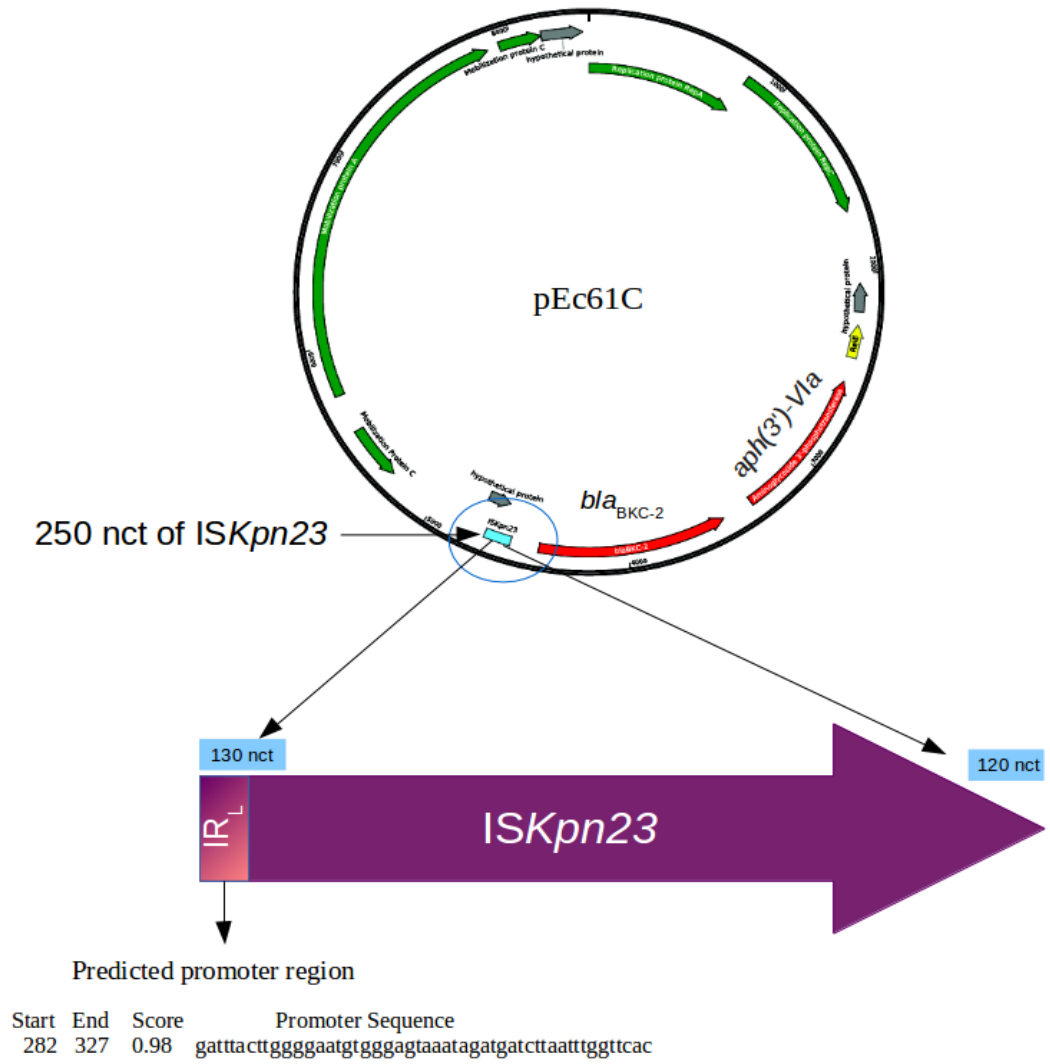

Supplement: AAC.01193-20-s0001.pdf [file AAC.01193-20-s0001.pdf]
